# Supplementary material
Source: ML conference proceedings conference paper supplement (https://aclanthology.org/P16-1175)
Supplement: Notes [file P16-1175.Notes.pdf]

# Appendices

## A Example of Learner Guesses vs. Model Predictions

To give a sense of the problem difficulty, we have hand-picked and presented two training samples (see Figure 7) with our basic model’s predictions. In Figure 7a a large portion of the sentence has been revealed to the user in English (blue text) only 2 words are in German. The text in bold font is the user’s guess. Our model expected both words to be guessed; the predictions are listed below the German words *Verschiedene* and *Regierungen*. The reference translation for the 2 words are *Various* and *governments*. In figure 7b we see a much harder context where only one word is shown in English, furthermore the revealed word is not particularly helpful as a contextual anchor.

|                         |                                                                                                      |                                                                                                |
|-------------------------|------------------------------------------------------------------------------------------------------|------------------------------------------------------------------------------------------------|
| User's guess:           | <b>BLANK</b>                                                                                         | <b>countries</b>                                                                               |
| Macaronic :<br>Sentence | Verschiedene <b>groups are fighting against</b> the <b>Regierungen</b> of Afghanistan and Pakistan . |                                                                                                |
| Predictions:            | different -3.2990<br>together -3.591<br>decided -6.0850<br>considered -6.2010<br>parliament -6.3400  | countries -3.9482<br>border -4.2853<br>regions -6.2433<br>legitimate -6.3764<br>region -6.4340 |

(a)

|                         |                                                                             |                                                                                         |                                                                             |                                                                                                       |                                                                         |                                                                              |
|-------------------------|-----------------------------------------------------------------------------|-----------------------------------------------------------------------------------------|-----------------------------------------------------------------------------|-------------------------------------------------------------------------------------------------------|-------------------------------------------------------------------------|------------------------------------------------------------------------------|
| User's guess:           | <b>party</b>                                                                | <b>BLANK</b>                                                                            | <b>BLANK</b>                                                                | <b>night</b>                                                                                          | <b>and</b>                                                              | <b>day .</b>                                                                 |
| Macaronic :<br>Sentence | <b>Therefore</b> paare durften nur noch ein Kind .                          |                                                                                         |                                                                             |                                                                                                       |                                                                         |                                                                              |
| Predictions:            | farther -3.9933<br>are -4.6289<br>far -4.9615<br>car -5.1015<br>bar -5.1958 | giving -4.6720<br>often -5.0708<br>driven -5.7605<br>european -5.8506<br>garden -6.0132 | news -2.2157<br>nor -4.5056<br>near -4.5816<br>tour -4.6186<br>sure -4.9564 | not -4.4239<br>touch -4.4329<br>such -4.4793<br>much -4.5182<br>watch -4.6984<br>...<br>night -5.6919 | ein -2.8807<br>in -4.6859<br>line -4.9601<br>fine -5.0726<br>on -5.0852 | kind -3.1842<br>find -3.6891<br>mind -3.7672<br>wind -3.9125<br>bind -4.4913 |

(b)

Figure 7: Two examples of the system’s predictions of what the user will guess on a single submission, contrasted with the user’s actual guess. (The user’s previous submissions on the same task instance are not shown.) In 7a, the model correctly expects that the substantial context will inform the user’s guess. In 7b, the model predicts that the user will fall back on string similarity. The numbers shown are log-probabilities. Both examples show the sentences in a macaronic state (after some reordering or translation has occurred). For example, the original text of the German sentence in 7b reads “Deshalb durften die Paare nur noch ein Kind bekommen.” The macaronic version has undergone some reordering, and has also erroneously dropped the verb due to an incorrect alignment.
